# Supplementary material for: Cocaine Self-Administration and Abstinence Modulate NMDA Receptor Subunits and Active Zone Proteins in the Rat Nucleus Accumbens
Source: MDPI journal article supplement (doi:10.3390/molecules25153480), 2020-07-31

# **COCAINE SELF-ADMINISTRATION AND ABSTINENCE MODULATE NMDA RECEPTOR SUBUNITS AND ACTIVE ZONE PROTEINS IN THE RAT NUCLEUS ACCUMBENS**

**Irena Smaga<sup>a\*</sup>, Karolina Wydra<sup>a</sup>, Małgorzata Frankowska<sup>a</sup>, Fabio Fumagalli<sup>b</sup>, Marek Sanak<sup>c</sup>,  
Małgorzata Filip<sup>a</sup>**

<sup>a</sup>Maj Institute of Pharmacology Polish Academy of Sciences, Department of Drug Addiction Pharmacology, Smętna 12, PL 31-343 Kraków, Poland

<sup>b</sup>Department of Pharmacological and Biomolecular Sciences, Università degli Studi di Milano, Via Balzaretti 9, 20133 Milano, Italy

<sup>c</sup>Department of Internal Medicine, Jagiellonian University Medical College, Skawińska 8, PL 31-066 Kraków, Poland

\* Corresponding author.

E-mail address: [smaga@if-pan.krakow.pl](mailto:smaga@if-pan.krakow.pl)

Tel.: +48 12 6623268, Fax: +48 12 6374500

Supporting Information Table 3. Corresponding membranes from Western blot analyses of NMDA receptor subunits and loading controls. YS- yoked saline, YC- yoked cocaine, SA- cocaine self-administration. Control protein ( $\beta$ -actin) for GluN1 and GluN2B was the same.

| NMDA receptor subunits                               | Membranes                                                                                                                                                                                                                                                                                                                            |
|------------------------------------------------------|--------------------------------------------------------------------------------------------------------------------------------------------------------------------------------------------------------------------------------------------------------------------------------------------------------------------------------------|
| <b>Cocaine abstinence in an enriched environment</b> |                                                                                                                                                                                                                                                                                                                                      |
| <b>GluN1</b>                                         | <p><b>GluN1</b></p> <p>110 kDa</p> <p>M 1YS 1YC 1SA 2YS 2YC 2SA 3YS 3YC 3SA 4YS 4YC 4SA 5YS 5YC 5SA 6YS 6YC 6SA 7YS 7YC 7SA 8YS 8YC 8SA M</p> <p><math>\beta</math>-actin</p> <p>48 kDa</p> <p>35 kDa</p> <p>M 1YS 1YC 1SA 2YS 2YC 2SA 3YS 3YC 3SA 4YS 4YC 4SA 5YS 5YC 5SA 6YS 6YC 6SA 7YS 7YC 7SA 8YS 8YC 8SA M</p>                 |
| <b>GluN2A</b>                                        | <p><b>GluN2A</b></p> <p>180 kDa</p> <p>135 kDa</p> <p>M 1YS 1YC 1SA 2YS 2YC 2SA 3YS 3YC 3SA 4YS 4YC 4SA 5YS 5YC 5SA 6YS 6YC 6SA 7YS 7YC 7SA 8YS 8YC 8SA M</p> <p><math>\beta</math>-actin</p> <p>48 kDa</p> <p>M 1YS 1YC 1SA 2YS 2YC 2SA 3YS 3YC 3SA 4YS 4YC 4SA 5YS 5YC 5SA 6YS 6YC 6SA 7YS 7YC 7SA 8YS 8YC 8SA M</p>               |
| <b>GluN2B</b>                                        | <p><b>GluN2B</b></p> <p>180 kDa</p> <p>135 kDa</p> <p>M 1YS 1YC 1SA 2YS 2YC 2SA 3YS 3YC 3SA 4YS 4YC 4SA 5YS 5YC 5SA 6YS 6YC 6SA 7YS 7YC 7SA 8YS 8YC 8SA M</p> <p><math>\beta</math>-actin</p> <p>48 kDa</p> <p>35 kDa</p> <p>M 1YS 1YC 1SA 2YS 2YC 2SA 3YS 3YC 3SA 4YS 4YC 4SA 5YS 5YC 5SA 6YS 6YC 6SA 7YS 7YC 7SA 8YS 8YC 8SA M</p> |
| <b>Cocaine abstinence in an isolated condition</b>   |                                                                                                                                                                                                                                                                                                                                      |
| <b>GluN1</b>                                         | <p><b>GluN1</b></p> <p>110 kDa</p> <p>M 1YS 1YC 1SA 2YS 2YC 2SA 3YS 3YC 3SA 4YS 4YC 4SA M 5YS 5YC 5SA 6YS 6YC 6SA 7YS 7YC 7SA M</p> <p><math>\beta</math>-actin</p> <p>48 kDa</p> <p>M 1YS 1YC 1SA 2YS 2YC 2SA 3YS 3YC 3SA 4YS 4YC 4SA M 5YS 5YC 5SA 6YS 6YC 6SA 7YS 7YC 7SA M</p>                                                   |

|                                                    |                                                                                                                                                                                                                                                                                                                                                                                                                                                                                                                                                  |
|----------------------------------------------------|--------------------------------------------------------------------------------------------------------------------------------------------------------------------------------------------------------------------------------------------------------------------------------------------------------------------------------------------------------------------------------------------------------------------------------------------------------------------------------------------------------------------------------------------------|
| <b>GluN2A</b>                                      | <p>GluN2A</p> 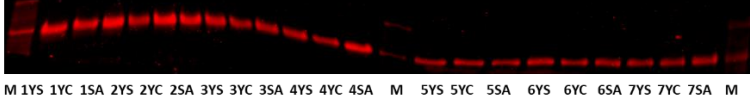 <p>245 kDa<br/>180 kDa<br/>135 kDa</p> <p>245 kDa<br/>180 kDa</p> <p>M 1YS 1YC 1SA 2YS 2YC 2SA 3YS 3YC 3SA 4YS 4YC 4SA M 5YS 5YC 5SA 6YS 6YC 6SA 7YS 7YC 7SA M</p> <p>β-actin</p>  <p>48 kDa<br/>35 kDa</p> <p>48 kDa</p> <p>M 1YS 1YC 1SA 2YS 2YC 2SA 3YS 3YC 3SA 4YS 4YC 4SA M 5YS 5YC 5SA 6YS 6YC 6SA 7YS 7YC 7SA M</p>                                    |
| <b>GluN2B</b>                                      | <p>GluN2B</p>  <p>180 kDa<br/>135 kDa</p> <p>180 kDa</p> <p>M 1YS 1YC 1SA 2YS 2YC 2SA 3YS 3YC 3SA 4YS 4YC 4SA M 5YS 5YC 5SA 6YS 6YC 6SA 7YS 7YC 7SA M</p> <p>β-actin</p>  <p>48 kDa</p> <p>48 kDa</p> <p>M 1YS 1YC 1SA 2YS 2YC 2SA 3YS 3YC 3SA 4YS 4YC 4SA M 5YS 5YC 5SA 6YS 6YC 6SA 7YS 7YC 7SA M</p>                                                                       |
| <b>Cocaine abstinence with extinction training</b> |                                                                                                                                                                                                                                                                                                                                                                                                                                                                                                                                                  |
| <b>GluN1</b>                                       | <p>GluN1</p>  <p>110 kDa</p> <p>110 kDa</p> <p>M 1YS 1YC 1SA 2YS 2YC 2SA 3YS 3YC 3SA 4YS 4YC 4SA 5YS 5YC 5SA 6YS 6YC 6SA 7YS 7YC 7SA 8YS 8YC 8SA M</p> <p>β-actin</p>  <p>48 kDa<br/>35 kDa</p> <p>48 kDa<br/>35 kDa</p> <p>M 1YS 1YC 1SA 2YS 2YC 2SA 3YS 3YC 3SA 4YS 4YC 4SA 5YS 5YC 5SA 6YS 6YC 6SA 7YS 7YC 7SA 8YS 8YC 8SA M</p>                                       |
| <b>GluN2A</b>                                      | <p>GluN2A</p>  <p>245 kDa<br/>180 kDa<br/>135 kDa</p> <p>245 kDa<br/>180 kDa</p> <p>M 1YS 1YC 1SA 2YS 2YC 2SA 3YS 3YC 3SA 4YS 4YC 4SA 5YS 5YC 5SA 6YS 6YC 6SA 7YS 7YC 7SA 8YS 8YC 8SA M</p> <p>β-actin</p>  <p>48 kDa<br/>35 kDa</p> <p>48 kDa<br/>35 kDa</p> <p>M 1YS 1YC 1SA 2YS 2YC 2SA 3YS 3YC 3SA 4YS 4YC 4SA 5YS 5YC 5SA 6YS 6YC 6SA 7YS 7YC 7SA 8YS 8YC 8SA M</p> |

**GluN2B**

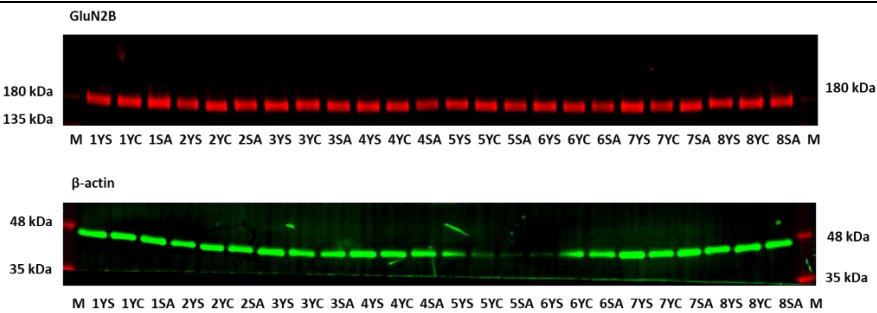

**Cocaine abstinence without instrumental task**

**GluN1**

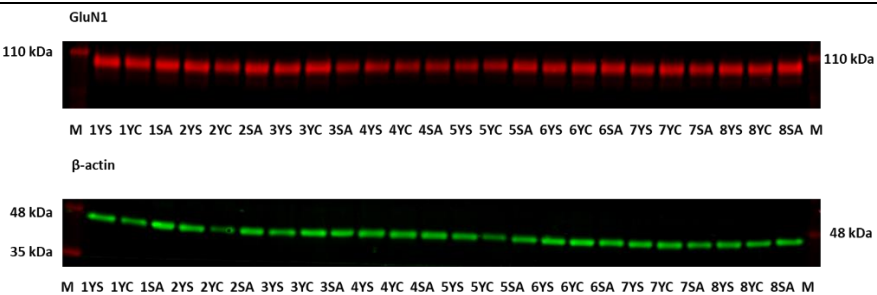

**GluN2A**

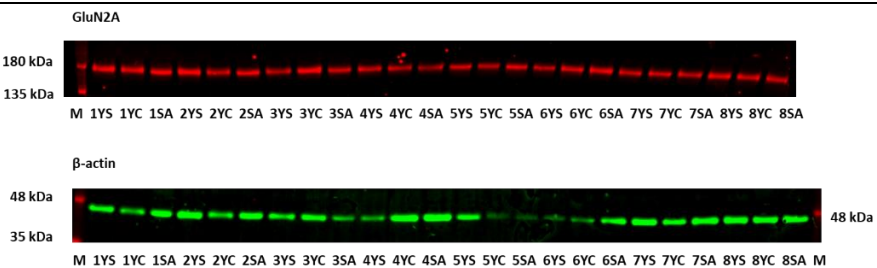

**GluN2B**

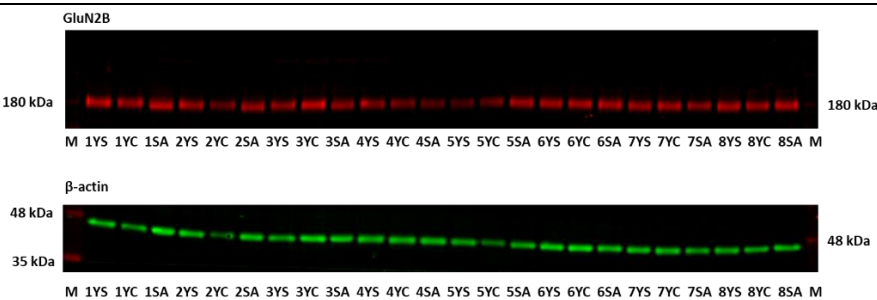

Supplement: s1 [file s1]
